# Supplementary material
Source: publisher figshare collection journal article supplement (https://acs.figshare.com/ndownloader/files/22677971)
Supplement: Supplementary file 1 [file 22677971]

## **Supporting information**

### **Deciphering the Mechanism of the Anti-Hypertensive Effect of Isorhynchophylline by Targeting Neurotransmitters Metabolism of Hypothalamus in Spontaneously Hypertensive Rats**

Yuan Li<sup>1,2,3</sup>, Ruixue Yu<sup>4</sup>, Dan Zhang<sup>1,2,3</sup>, Wenqing Yang<sup>1,2,3</sup>, Qingqing Hou<sup>4</sup>,

Yunlun Li<sup>1,5\*</sup>, Haiqiang Jiang<sup>1,2,3\*</sup>

<sup>1</sup>Experimental Center, Shandong University of Traditional Chinese Medicine, Jinan 250355, Shandong, China, <sup>2</sup>Key Laboratory of Traditional Chinese Medicine Classical Theory, Ministry of Education, Shandong University of Traditional Chinese Medicine, Jinan 250355, Shandong, China, <sup>3</sup>Shandong Provincial Key Laboratory of Traditional Chinese Medicine for Basic research, Shandong University of Traditional Chinese Medicine, Jinan 250355, Shandong, China, <sup>4</sup>College of Pharmaceutical Sciences, Shandong University of Traditional Chinese Medicine, Jinan 250355, Shandong, China, <sup>5</sup>Traditional Chinese Medicine Clinical Research Base for Hypertension, Affiliated Hospital of Shandong University of Traditional Chinese Medicine, Jinan 250011, Shandong, China

## Supplemental Table

Table S1 Metabolic pathways and corresponding potential biomarkers constructed via MetaboAnalyst software

| Pathway Name                                | Match status | <i>P</i>  | Impact  | Differential metabolites                              |
|---------------------------------------------|--------------|-----------|---------|-------------------------------------------------------|
| Tyrosine metabolism                         | 4/42         | 0.0049716 | 0.28195 | epinephrine, dopamine, L-tyrosine, homovanillic acid  |
| Histidine metabolism                        | 3/16         | 0.00657   | 0.40983 | L-glutamate, L-histidine, histamine                   |
| Alanine, aspartate and glutamate metabolism | 3/28         | 0.036177  | 0.39744 | L-glutamate, L-glutamine, $\gamma$ -aminobutyric acid |
| D-Glutamine and D-glutamate metabolism      | 2/6          | 0.0375    | 0.5     | L-glutamate, L-glutamine                              |
| Aminoacyl-tRNA biosynthesis                 | 4/48         | 0.0083008 | 0       | L-histidine, L-glutamine, L-tyrosine, L-glutamate     |
| Nitrogen metabolism                         | 2/6          | 0.0375    | 0       | L-glutamate, L-glutamine                              |
